# Supplementary material for: A Novel CDX2 Isoform Regulates Alternative Splicing
Source: PubMed Central journal article supplement (PMC4125279; doi:10.1371/journal.pone.0104293), 2014-08-07

Supplemental Figure 1.

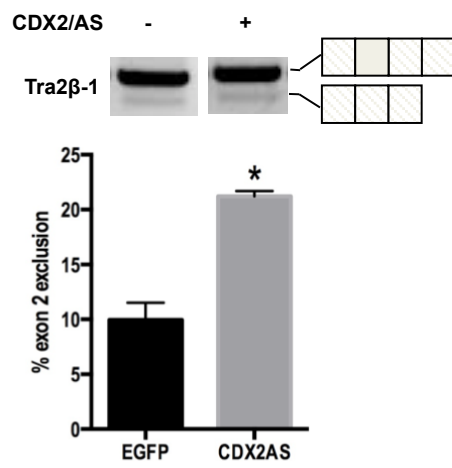

Supplement: pone.0104293.s001.pdf [file pone.0104293.s001.pdf]
